# Supplementary material for: A facile synthesis of mesoporous graphitic carbon nitride supported palladium nanoparticles as highly effective and reusable catalysts for Stille coupling reactions under mild conditions
Source: Royal Society of Chemistry journal article supplement (doi:10.1039/d0nj00546k), 2020-01-01
Supplement: d0nj00546k1.pdf [file d0nj00546k1.pdf]

**Electronic Supplementary Material**

**A Facile Synthesis of Mesoporous Graphitic Carbon Nitride Supported Palladium Nanoparticles as  
Highly Effective and Reusable Catalysts for the Stille Coupling Reactions under Mild Conditions**

Erbay Kalay,<sup>[a],[b]</sup> Sultan Cetin,<sup>[a]</sup> Safacan Kolemen,<sup>[a],[c],\*</sup> Önder Metin<sup>[a],[c],\*</sup>

<sup>[a]</sup>Department of chemistry, College of Sciences, Koç University, 34450 Istanbul, TURKEY

<sup>[b]</sup>Kars Vocational School, Kafkas University, 36100 Kars, TURKEY

<sup>[c]</sup>Surface Science and Technology Center (KUYTAM), Koç University, 34450 Istanbul, TURKEY

e-mail: [ometin@ku.edu.tr](mailto:ometin@ku.edu.tr), [skolemen@ku.edu.tr](mailto:skolemen@ku.edu.tr)

### Tributyl(thiophen-2-yl)stannane <sup>1</sup>

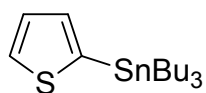

<sup>1</sup>H NMR (500 MHz, Chloroform-*d*)  $\delta$  7.69 – 7.66 (m, 1H), 7.30 – 7.28 (m, 1H), 7.22 (dd,  $J = 3.3, 0.8$  Hz, 1H), 1.65 – 1.56 (m, 6H), 1.37 (sext,  $J = 7.3$  Hz, 6H), 1.18 – 1.10 (m, 6H), 0.93 (t,  $J = 7.3$  Hz, 9H).

### 2-phenylthiophene <sup>2</sup>

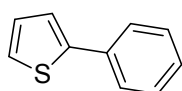

Light beige crystals; <sup>1</sup>H NMR (500 MHz, Chloroform-*d*)  $\delta$  7.62 (d,  $J = 8.3, 1.2$  Hz, 2H), 7.38 (t,  $J = 7.7$  Hz, 2H), 7.32-7.26 (m, 3H), 7.08 (dd,  $J = 5.1, 3.6$  Hz, 1H),

### 2-(*p*-tolyl)thiophene <sup>3</sup>

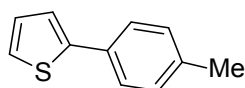

White solid; <sup>1</sup>H NMR (500 MHz, Chloroform-*d*)  $\delta$  7.53 (d,  $J = 8.2$  Hz, 2H), 7.29-7.26 (m, 2H), 7.21 (d,  $J = 7.9$  Hz, 2H), 7.08 (dd,  $J = 5.1, 3.6$  Hz, 1H), 2.39 (s, 3H).

### 2-(4-methoxyphenyl)thiophene <sup>4</sup>

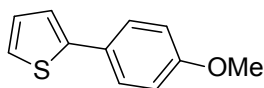

Colorless solid; <sup>1</sup>H NMR (500 MHz, Chloroform-*d*)  $\delta$  7.55 (d,  $J = 8.9$  Hz, 2H), 7.23-7.21 (m, 2H), 7.06 (dd,  $J = 5.1, 3.6$  Hz, 1H), 6.94-6.92 (m, 2H), 3.85 (s, 3H).

### 4-(thiophen-2-yl)benzonitrile <sup>5</sup>

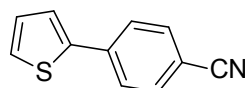

White solid; <sup>1</sup>H NMR (500 MHz, Chloroform-*d*)  $\delta$  7.71-7.65 (m, 4H), 7.43 (dd,  $J = 3.7, 1.0$  Hz, 1H), 7.41 (dd,  $J = 5.1, 1.0$  Hz, 1H), 7.14 (dd,  $J = 5.1, 3.7$  Hz, 1H).

### 2-(4-nitrophenyl)thiophene <sup>6</sup>

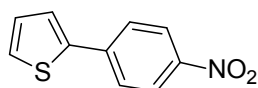

Yellow solid; <sup>1</sup>H NMR (500 MHz, Chloroform-*d*) δ 8.24 (d, *J* = 8.9 Hz, 2H), 7.75 (d, *J* = 8.9 Hz, 2H), 7.48 (dd, *J* = 3.7, 1.1 Hz, 1H), 7.44 (dd, *J* = 5.1, 1.1 Hz, 1H), 7.15 (dd, *J* = 5.1, 3.7 Hz, 1H).

### 1-(4-(thiophen-2-yl)phenyl)ethanone <sup>6</sup>

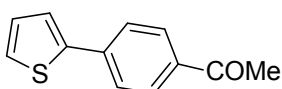

White solid; <sup>1</sup>H NMR (500 MHz, Chloroform-*d*) δ 7.98 (d, *J* = 8.6 Hz, 2H), 7.70 (d, *J* = 8.6 Hz, 2H), 7.44 (dd, *J* = 3.7, 1.1 Hz, 1H), 7.38 (dd, *J* = 5.1, 1.1 Hz, 1H), 7.13 (dd, *J* = 5.1, 3.7 Hz, 1H), 2.62 (s, 3H).

### 1,4-di(thiophen-2-yl)benzene <sup>7</sup>

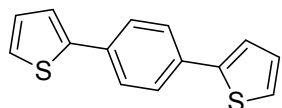

Shiny yellow spangles; <sup>1</sup>H NMR (500 MHz, Chloroform-*d*) δ 7.64 (s, 4H), 7.35 (dd, *J* = 3.6, 1.0 Hz, 2H), 7.30 (dd, *J* = 5.1, 1.0 Hz, 2H), 7.11 (dd, *J* = 5.1, 3.6 Hz, 2H).

### 1,1'-biphenyl <sup>4</sup>

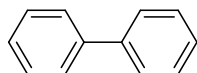

White solid; <sup>1</sup>H NMR (500 MHz, Chloroform-*d*) δ 7.65-7.64 (m, 4H), 7.50-7.47 (m, Hz, 4H), 7.38 (m, 2H).

### 4-methyl-1,1'-biphenyl <sup>8</sup>

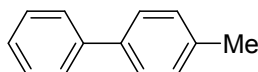

White solid; <sup>1</sup>H NMR (500 MHz, Chloroform-*d*) δ 7.62 (td, *J* = 8.7, 8.1, 1.2 Hz, 2 H), 7.53-7.50 (m, 2 H), 7.47-7.42 (m, 2 H), 7.35-7.32 (m, 1 H), 7.28 (d, *J* = 8.5 Hz, 2 H), 2.43 (s, 3H).

### 4-methoxy-1,1'-biphenyl <sup>9</sup>

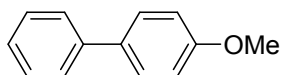

White solid;  $^1\text{H}$  NMR (500 MHz, Chloroform-*d*)  $\delta$  7.58-7.54 (m, 4H), 7.45-7.41 (m, 2H), 7.34-7.30 (m, 1H), 7.00 (d,  $J$  = 8.8 Hz, 2H), 3.87 (s, 3H).

**4-nitro-1,1'-biphenyl** <sup>10</sup>

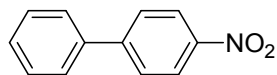

Yellow solid;  $^1\text{H}$  NMR (500 MHz, Chloroform-*d*)  $\delta$  8.31 (d,  $J$  = 8.8 Hz, 2H), 7.74 (d,  $J$  = 8.8 Hz, 2H), 7.66-7.62 (m, 2H), 7.53-7.50 (m, 2H), 7.48-7.45 (m, 1H).

**[1,1'-biphenyl]-4-carbonitrile** <sup>10</sup>

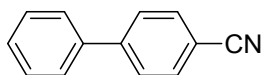

White solid;  $^1\text{H}$  NMR (500 MHz, Chloroform-*d*)  $\delta$  7.74-7.68 (m, 4H), 7.61-7.60 (m, 2H), 7.50 (dd,  $J$  = 8.2, 6.7 Hz, 2H), 7.46-7.42 (m, 1H).

**1-([1,1'-biphenyl]-4-yl)ethanone** <sup>9</sup>

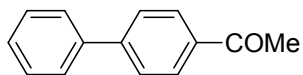

White solid;  $^1\text{H}$  NMR (500 MHz, Chloroform-*d*)  $\delta$  8.05 (d,  $J$  = 8.4 Hz, 2H), 7.70 (d,  $J$  = 8.4 Hz, 2H), 7.66-7.62 (m,  $J$  = 8.4 Hz, 2H), 7.51-7.46 (m, 2H), 7.44-7.39 (m, 1H), 2.65 (s, 3H).

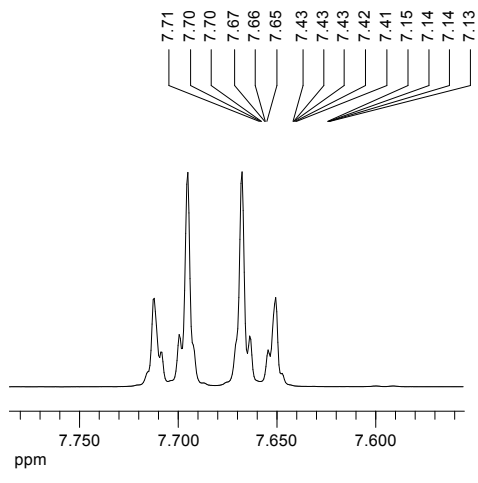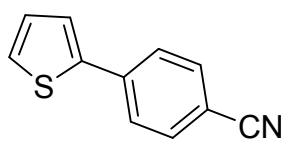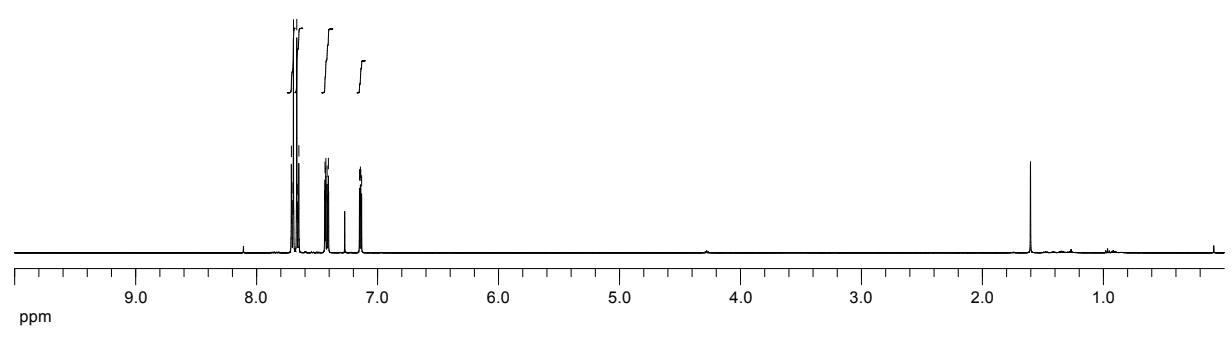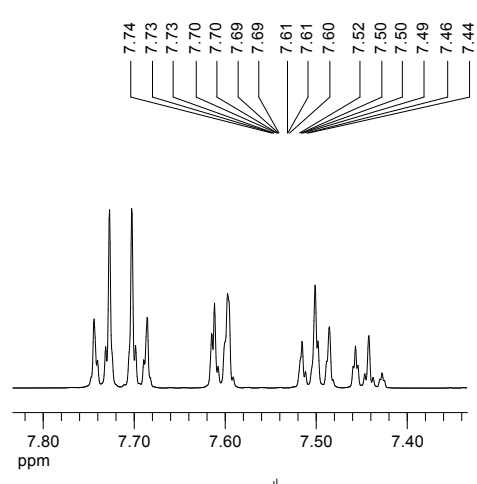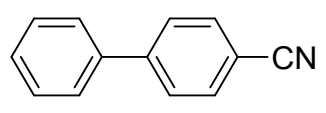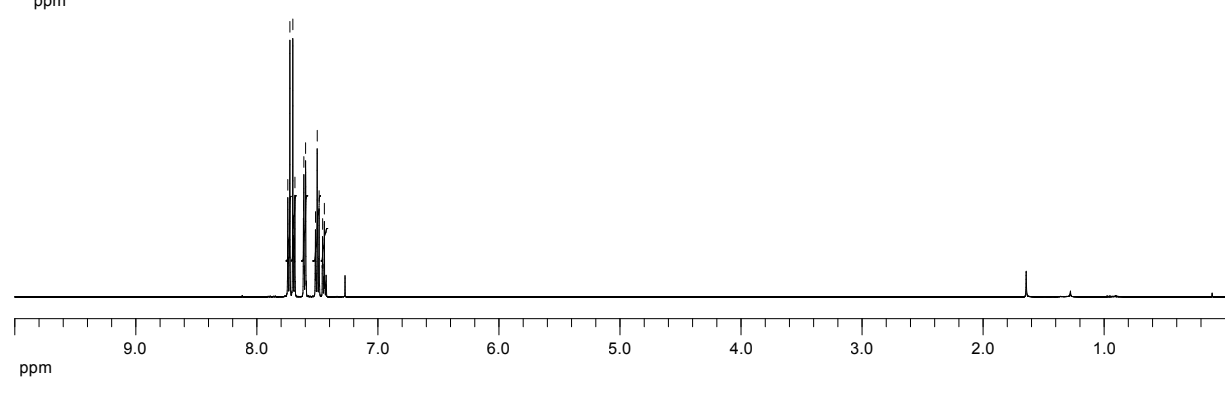

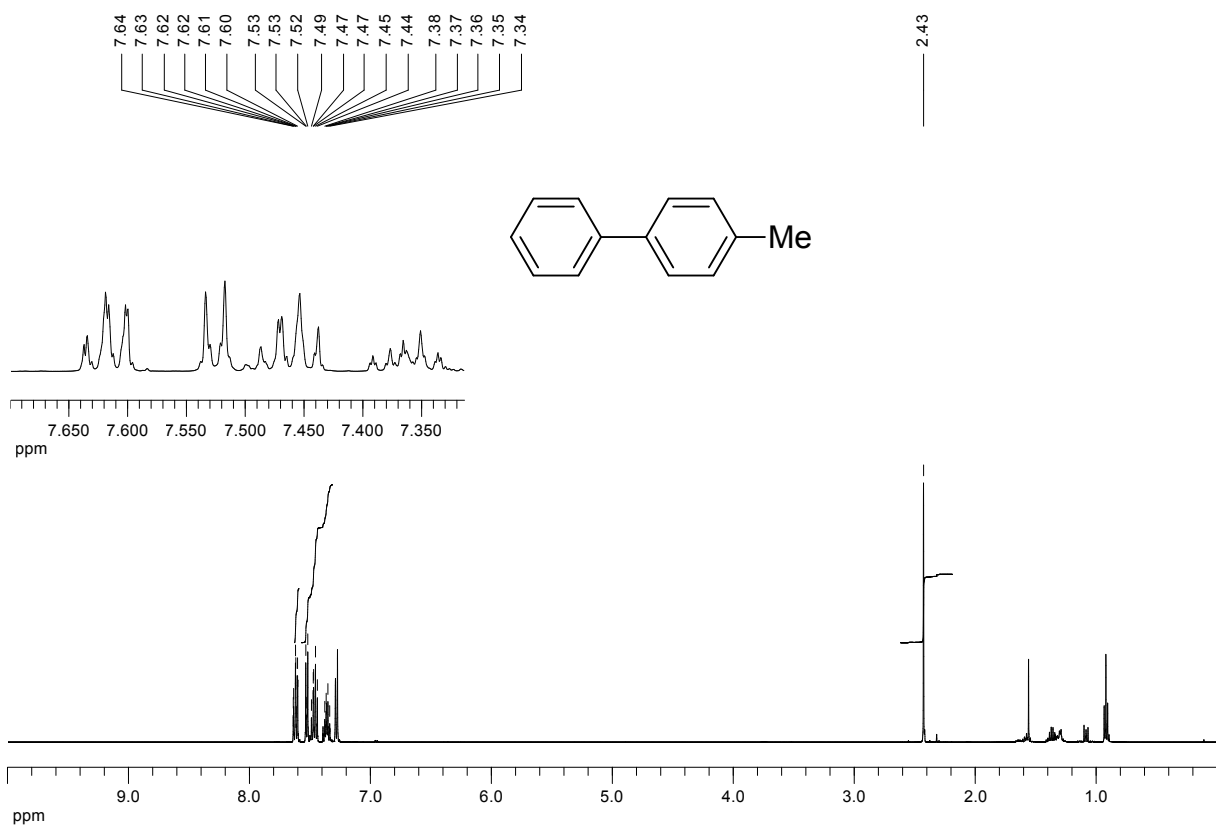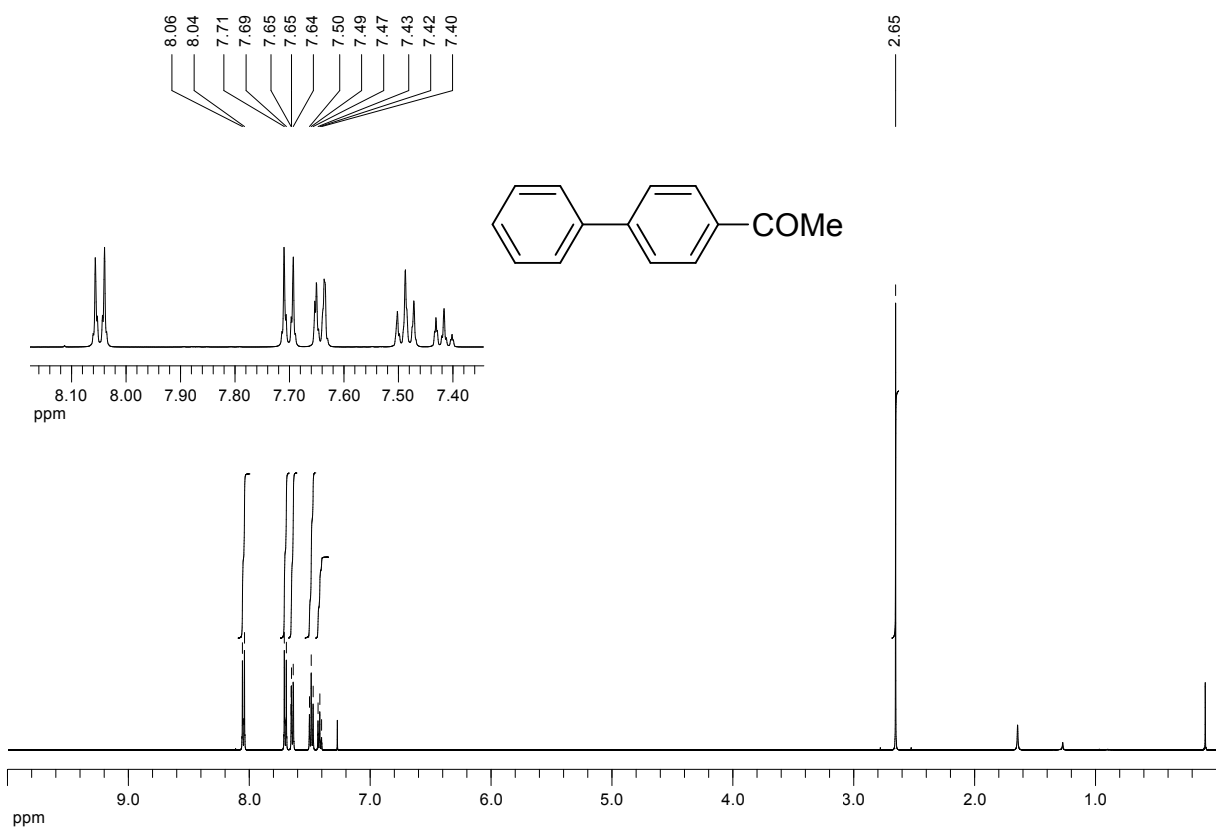

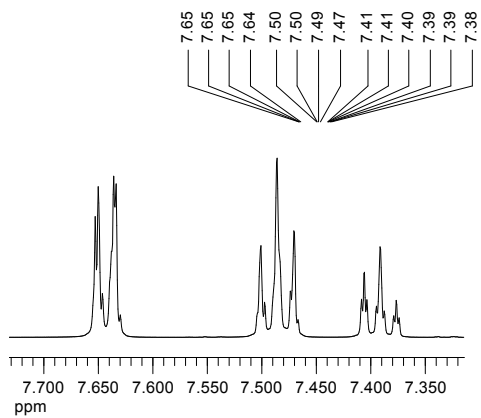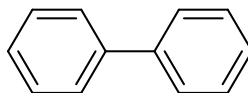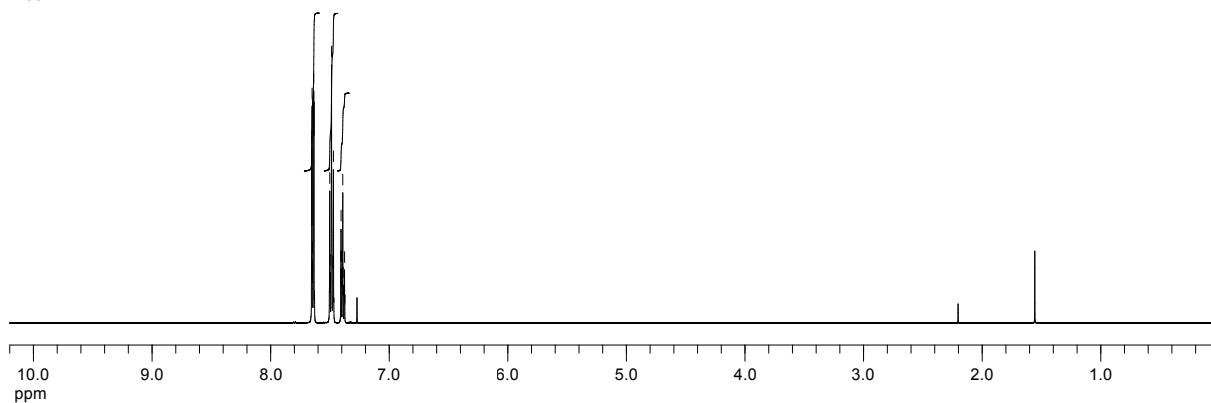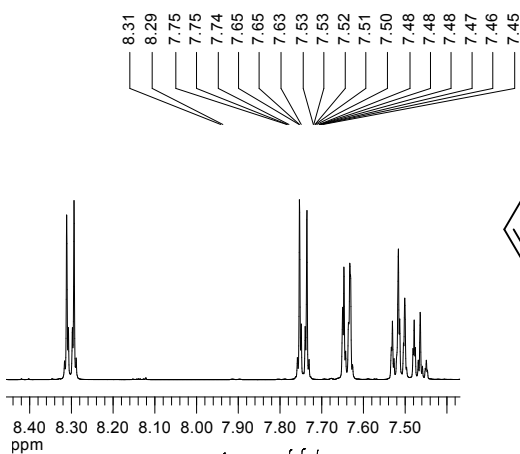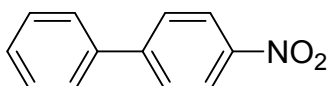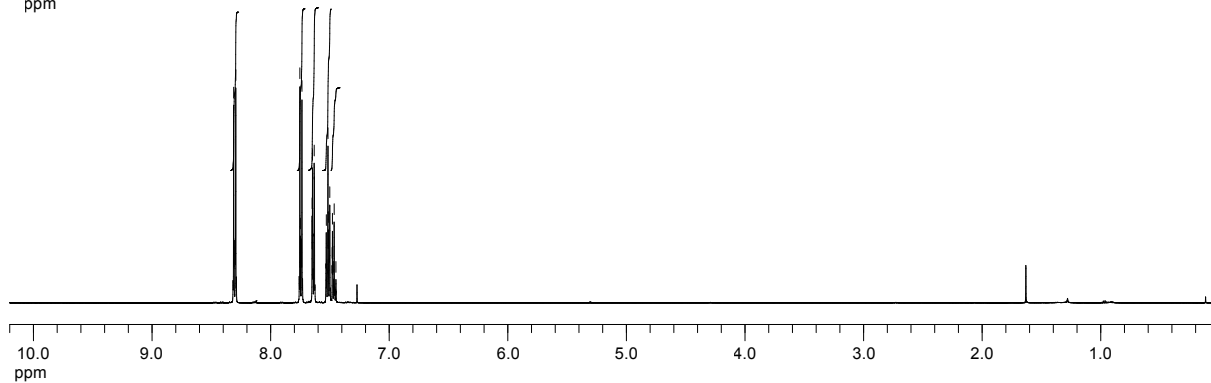

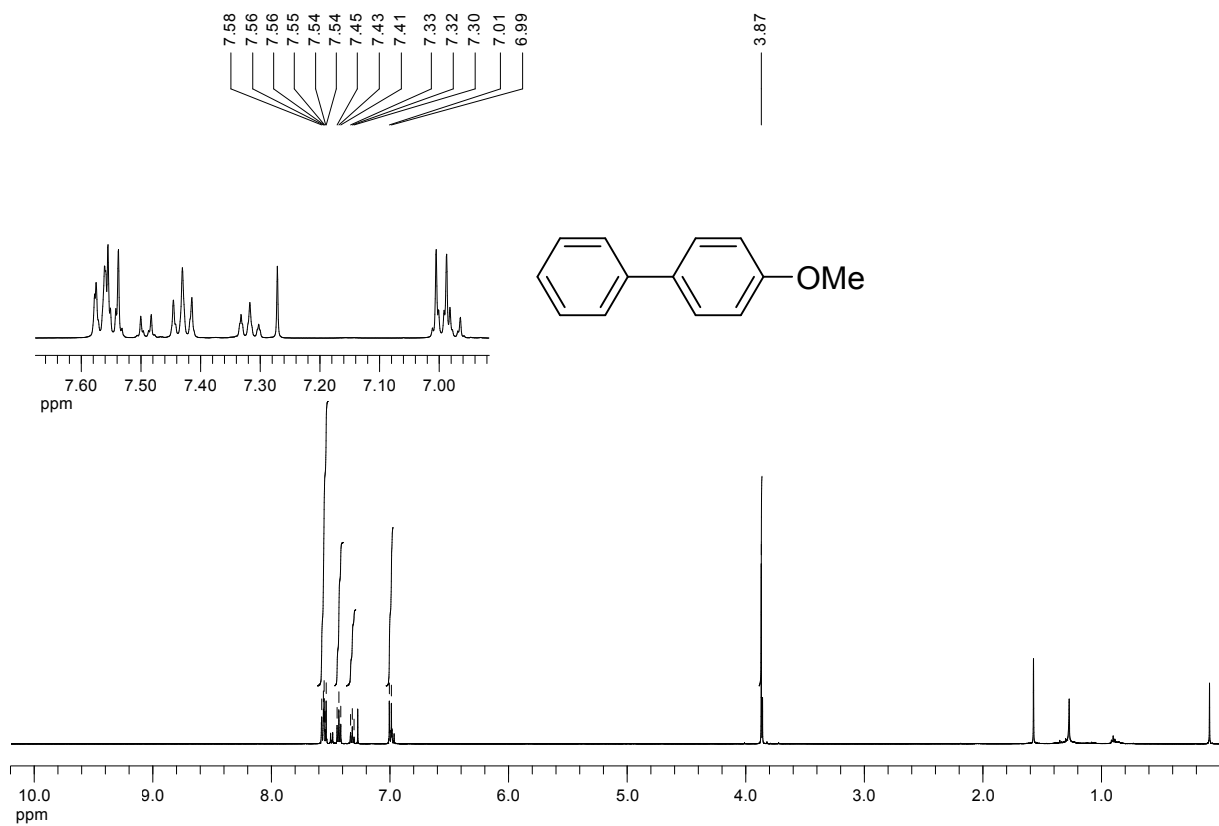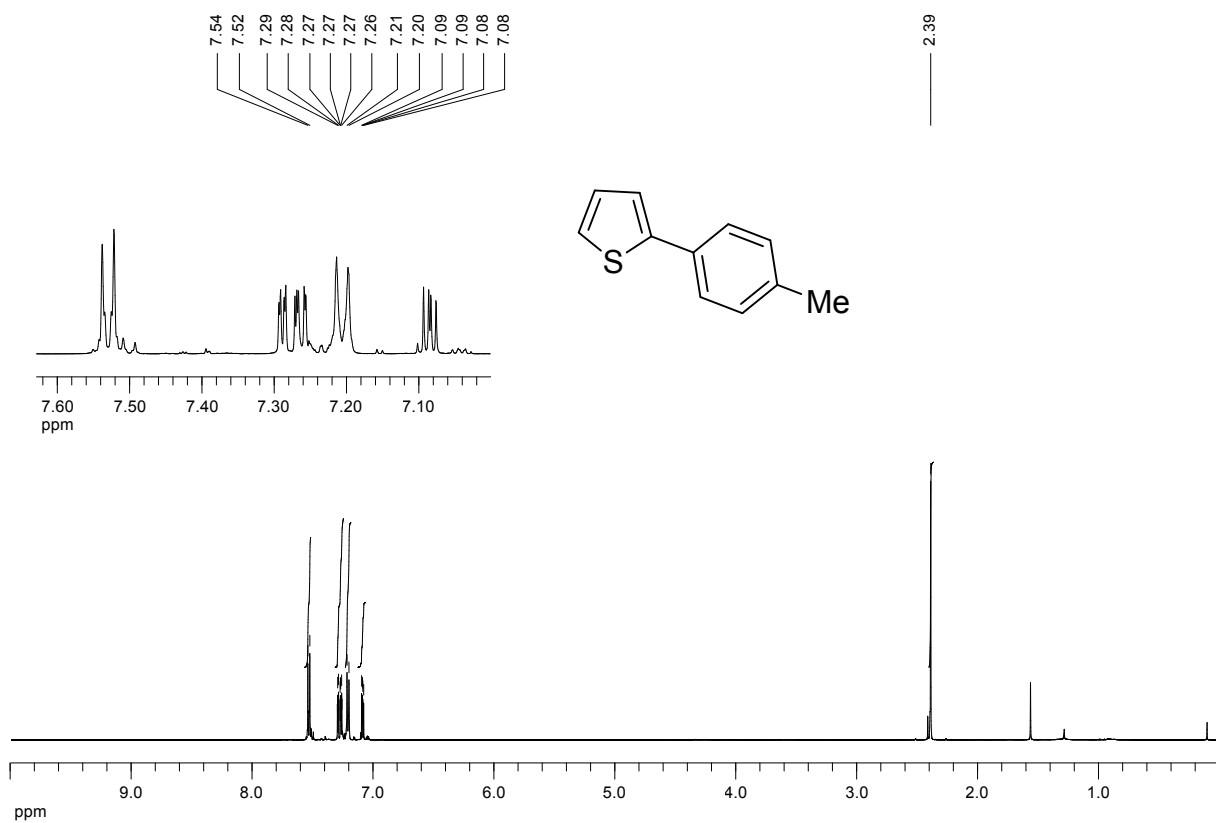



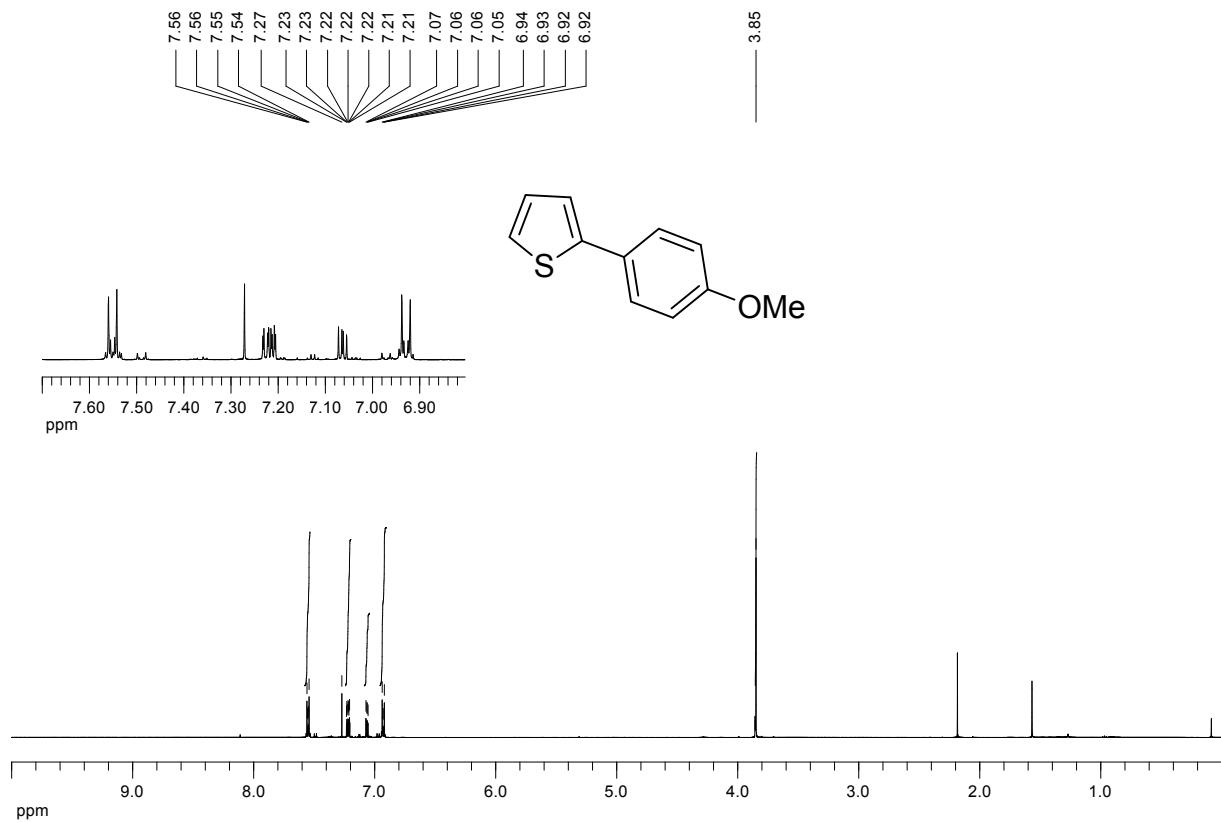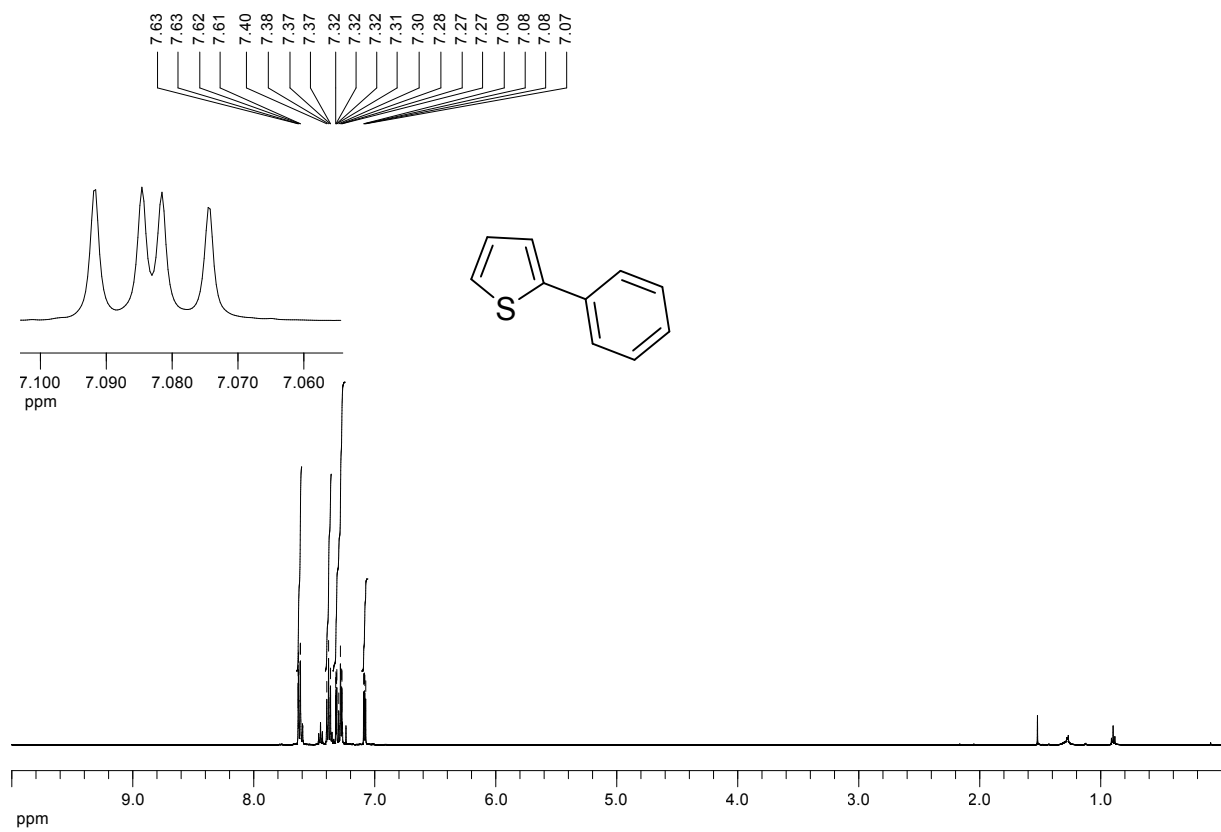

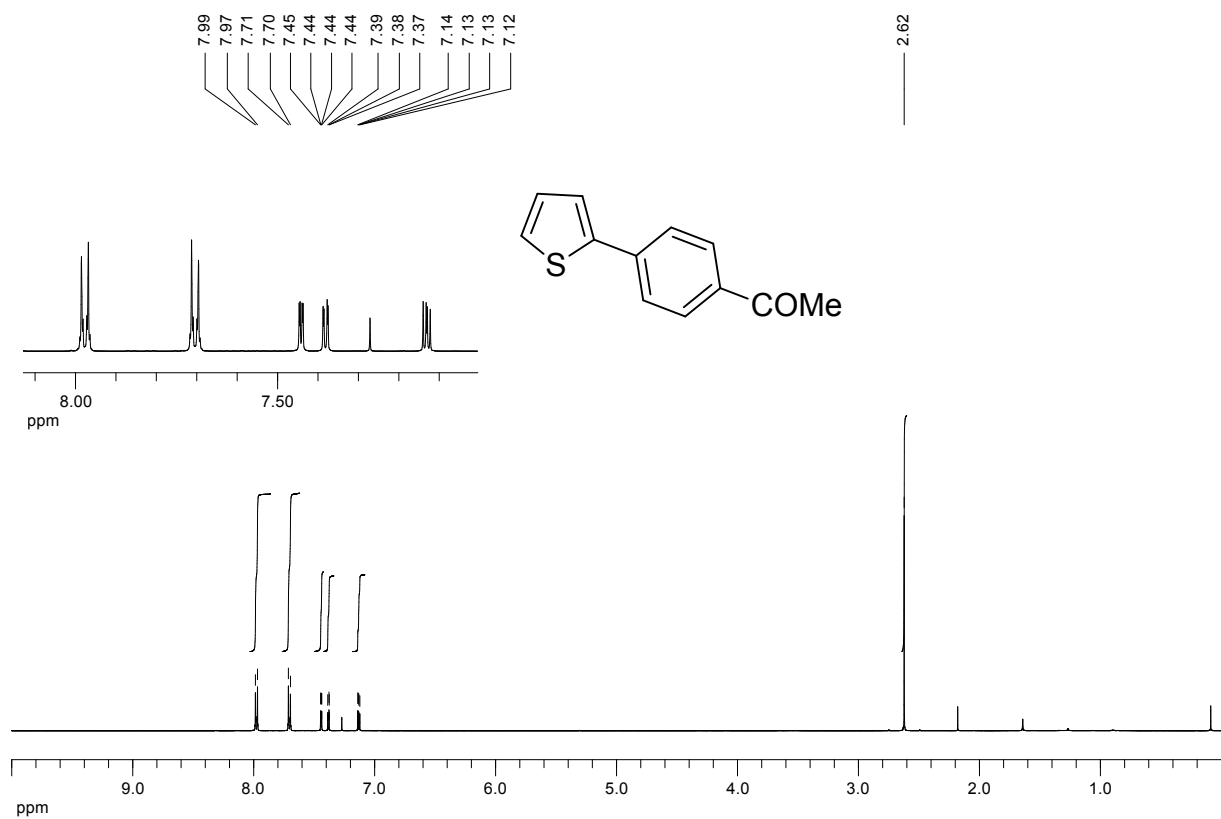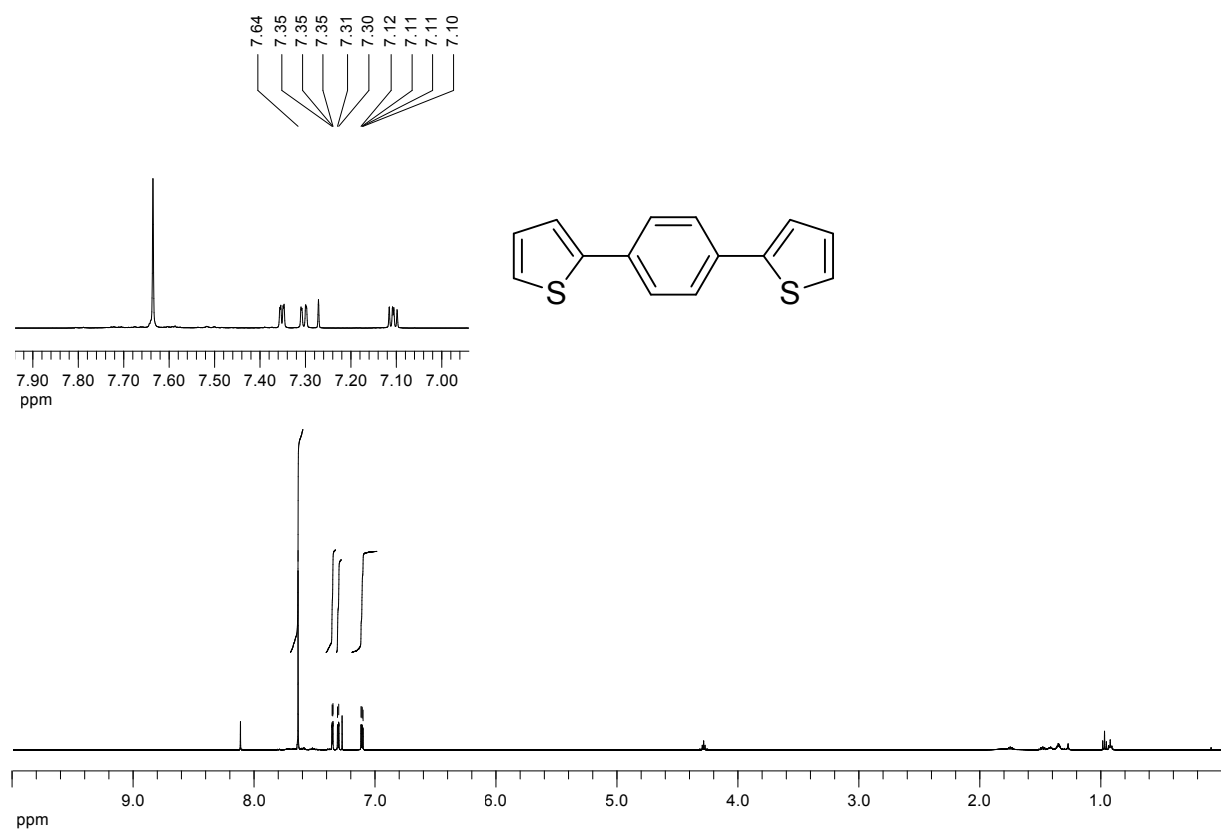

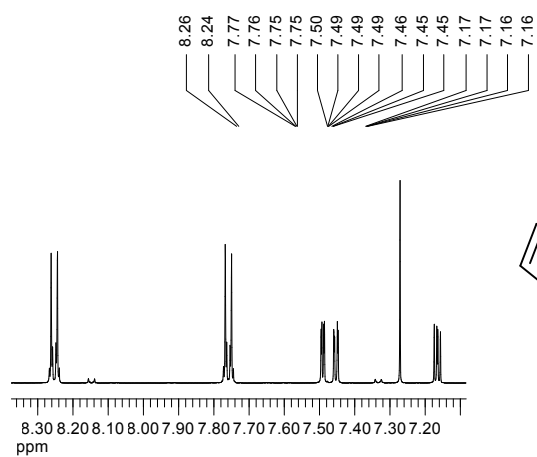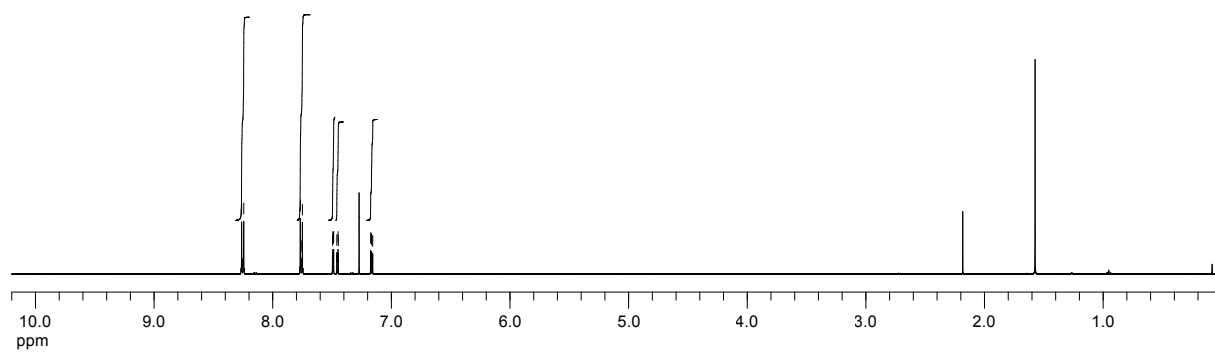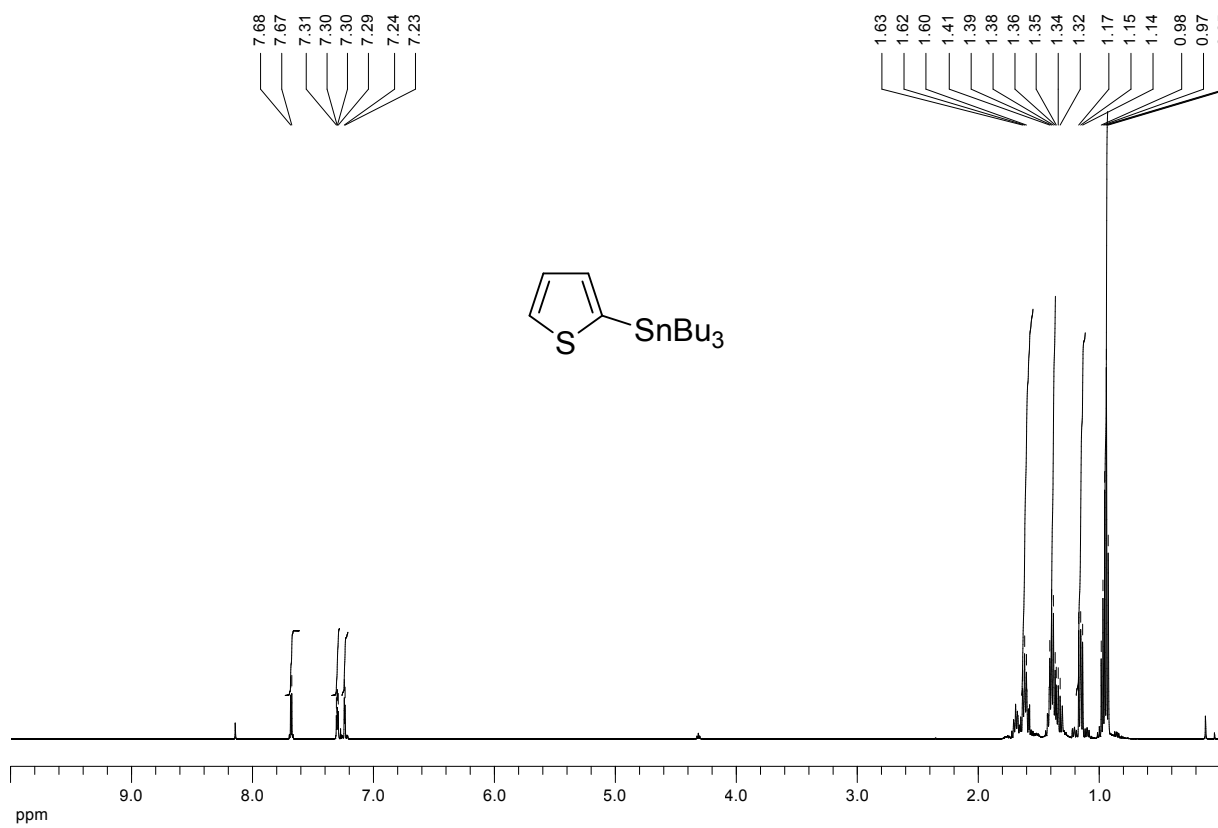

**Table S1.** Heterogeneous Pd-based catalysts that have been tested in Stille cross-coupling reactions.

| No | Catalyst                                                 | Mol (%)  | Base                            | Solvent                | Temp (°C) | Time (h)  | Yield (%) |       |       | Recycles | Ref. |
|----|----------------------------------------------------------|----------|---------------------------------|------------------------|-----------|-----------|-----------|-------|-------|----------|------|
|    |                                                          |          |                                 |                        |           |           | PhI       | PhBr  | PhCl  |          |      |
| 1  | Pd <sub>np-2</sub>                                       | 1.0      | K <sub>2</sub> CO <sub>3</sub>  | DMF                    | 110       | 7-16      | -         | 80-94 | -     | 6        | 10   |
| 2  | NAP-Mg-Pd                                                | 1-3      | NaOAc                           | NMP                    | 100       | 2-18      | 90-95     | 88    | 70-92 | 4        | 11   |
| 3  | Pd-EGCG-CF.                                              | 1-2.5    | -                               | DMF                    | 60-80     | 5-24      | 84-88     | -     | -     | 5        | 12   |
| 4  | Fe <sub>3</sub> O <sub>4</sub> /SiO <sub>2</sub> -PAP-Pd | 0.75     | Na <sub>2</sub> CO <sub>3</sub> | PEG                    | 80        | 0.5-4     | 40-96     | 89-98 | 51    | 5        | 13   |
| 5  | MCM-41-2P-Pd                                             | 0.5-2    | -                               | DMF                    | 25-100    | 4-24      | 4-23      | -     | -     | 10       | 14   |
| 6  | PdNPs@H <sub>2</sub> P-CMP                               | 0.5      | -                               | H <sub>2</sub> O       | 80        | 5         | -         | -     | 88-96 | 10       | 15   |
| 7  | PS-dpp-Pd(0)                                             | 1.0      | -                               | DMF                    | 65-120    | 7-14      | 83-88     | -     | 71-75 | 5        | 16   |
| 8  | Pd/CaCO <sub>3</sub>                                     | 0.5-5    | K <sub>2</sub> CO <sub>3</sub>  | EtOH/ H <sub>2</sub> O | 80        | 24        | 75-93     | 66-98 | 60    | 3        | 17   |
| 9  | Fe <sub>3</sub> O <sub>4</sub> @PTA-Pd                   | 5        | DMAP                            | PEG                    | 100       | 0.5-2.5   | 78-97     | 93-98 | 79    | 2        | 18   |
| 10 | PdNPs/C@Fe <sub>3</sub> O <sub>4</sub>                   | 0.73-1.5 | K <sub>2</sub> CO <sub>3</sub>  | DMF                    | 100       | 12-24     | 82-99     | 45-99 | 68-82 | 5        | 8    |
| 11 | Pd(0)-SMT-MCM-41                                         | 1.2      | K <sub>2</sub> CO <sub>3</sub>  | PEG                    | 80        | 20-165min | 95-97     | 94-97 | 95-96 | -        | 19   |
| 12 | SBA-15-EDTA-Pd                                           | 0.87     | -                               | DMSO                   | 120       | 4-20      | 80-94     | 85-90 | 76    | -        | 20   |
| 13 | SBA-Pd                                                   | 0.157    | Na <sub>2</sub> CO <sub>3</sub> | PEG                    | 80        | 10-360min | 85-96     | 68-95 | 71    | 6        | 21   |
| 14 | Boehmite@tryptophan-Pd                                   | 0.075    | Na <sub>2</sub> CO <sub>3</sub> | EtOH                   | 70        | 50-210min | 87-96     | 77-94 | 78    | 5        | 22   |
| 15 | Pd(0)-guanidine@MCM41                                    |          | KOH                             | DMSO                   | 80        | 20-185min | 65-97     | 65-93 | -     | 10       | 23   |
| 16 | Fe <sub>3</sub> O <sub>4</sub> @MCM-41@Pd-SPATB          | 0.94     | K <sub>2</sub> CO <sub>3</sub>  | PEG                    | 80        | 40-140min | 88-94     | 84-93 | -     | 5        | 24   |

## References

- 1 T. Akiyama, T. Taniguchi, N. Saito, R. Doi, T. Honma, Y. Tamenori, Y. Ohki, N. Takahashi, H. Fujioka, Y. Sato and M. Arisawa, *Green Chem.*, 2017, **19**, 3357–3369.
- 2 C. Istanbuluoglu, S. Göker, G. Hizalan, S. O. Hacıoglu, Y. A. Udum, E. D. Yildiz, A. Cirpan and L. Toppare, *New J. Chem.*, 2015, **39**, 6623–6630.
- 3 P. S. Gribanov, Y. D. Golenko, M. A. Topchiy, L. I. Minaeva, A. F. Asachenko and M. S. Nechaev, *Chem. Eur. J.*, 2018, **2018**, 120–125.
- 4 M. E. Budén, J. F. Guastavino and R. A. Rossi, *Org. Lett.*, 2013, **15**, 1174–1177.
- 5 D. P. Hari, P. Schroll and B. König, *J. Am. Chem. Soc.*, 2012, **134**, 2958–2961.
- 6 Y. Yabe, T. Maegawa, Y. Monguchi and H. Sajiki, *Tetrahedron*, 2010, **66**, 8654–8660.
- 7 D. Saha, R. Sen, T. Maity and S. Koner, *Langmuir*, 2013, **29**, 3140–3151.
- 8 B. S. Kumar, R. Anbarasan, A. J. Amali and K. Pitchumani, *Tetrahedron Lett.*, 2017, **58**, 3276–3282.
- 9 J. H. Li, B. X. Tang, L. M. Tao, Y. X. Xie, Y. Liang and M. B. Zhang, *J. Org. Chem.*, 2006, **71**, 7488–7490.
- 10 J. F. Cívicos, D. A. Alonso and C. Nájera, *Adv. Synth. Catal.*, 2011, **353**, 1683–1687.
- 11 M. L. Kantam, S. Roy, M. Roy, B. Sreedhar and B. M. Choudary, *Adv. Synth. Catal.*, 2005, **347**, 2002–2008.
- 12 B. Mohammadi-Aghdam, S. Bahari and R. Molaei, *J. Chem. Sci.*, 2013, **125**, 813–817.
- 13 A. Ghorbani-Choghamarani and M. Norouzi, *Appl. Organomet. Chem.*, 2016, **30**, 140–147.
- 14 W. Hao, J. Sha, S. Sheng and M. Cai, *J. Mol. Catal. A: Chem.*, 2009, **298**, 94–98.
- 15 N. Huang, Y. Xu and D. Jiang, *Sci. Rep.*
- 16 S. Bahari, B. Mohammadi-Aghdam, R. Molaei and Z. Gharibi, *Can. J. Chem.*, 2012, **90**, 784–789.
- 17 A. v. Coelho, A. L. F. de Souza, P. G. de Lima, J. L. Wardell and O. A. C. Antunes, *Tetrahedron Lett.*, 2007, **48**, 7671–7674.

- 18 A. Ghorbani-Choghamarani and M. Norouzi, *New J. Chem.*, 2016, **40**, 6299–6307.
- 19 N. Noori, M. Nikoorazm and A. Ghorbani-Choghamarani, *J. Porous Mater.*, 2016, **23**, 1467–1481.
- 20 J. Rathod, P. Sharma, P. Pandey, A. P. Singh and P. Kumar, *J. Porous Mater.*, 2017, **24**, 837–846.
- 21 A. Ghorbani-Choghamarani, A. A. Derakhshan, M. Hajjami and L. Rajabi, *Catal. Lett.*, 2017, **147**, 110–127.
- 22 A. Ghorbani-Choghamarani, M. Mohammadi, R. H. E. Hudson and T. Tamoradi, *Appl. Organomet. Chem.*, 2019, **33**, 1–11.
- 23 H. Filian, A. Ghorbani-Choghamarani and E. Tahanpesar, *J. Porous Mater.*, 2019, **26**, 1091–1101.
- 24 M. Nikoorazm, F. Ghorbani, A. Ghorbani-Choghamarani and Z. Erfani, *Appl. Organomet. Chem.*, 2018, **32**, 1–13.
